# Supplementary figures and images for: A scalable and highly immunogenic virus‐like particle‐based vaccine against SARS‐CoV‐2
Source: PubMed Central journal article supplement — Allergy. 2021 Sep 20:10.1111/all.15080. Online ahead of print. doi: 10.1111/all.15080 (PMC8653185; doi:10.1111/all.15080), 2021-09-20

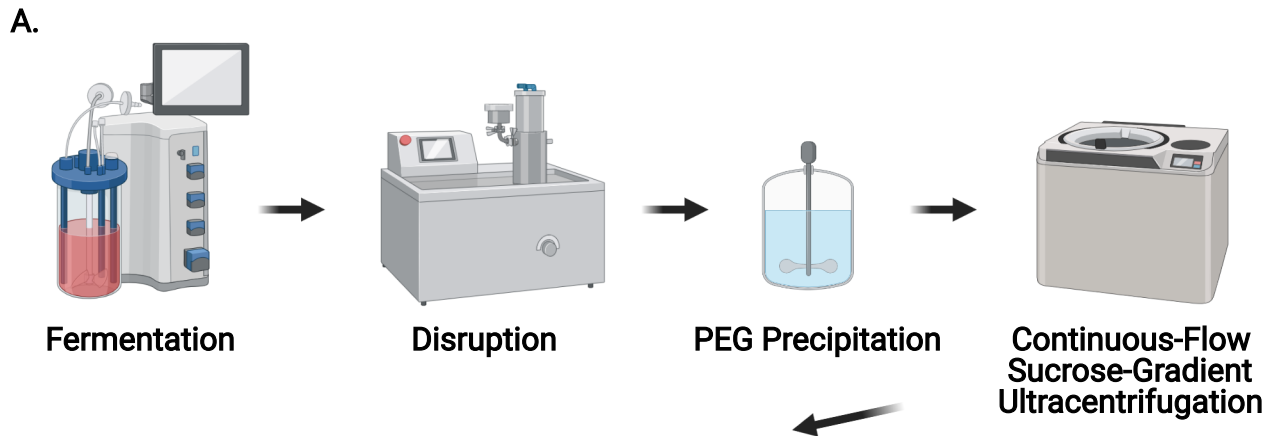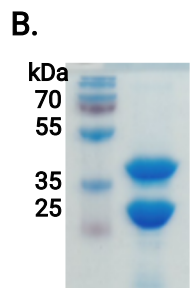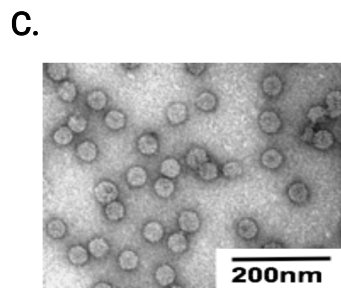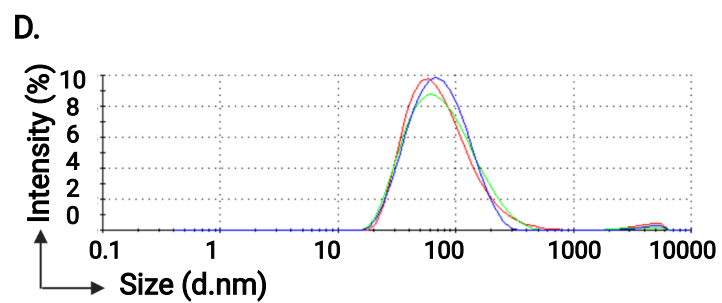

Supplement: ALL-9999-0-s001.pdf [file ALL-9999-0-s001.pdf]

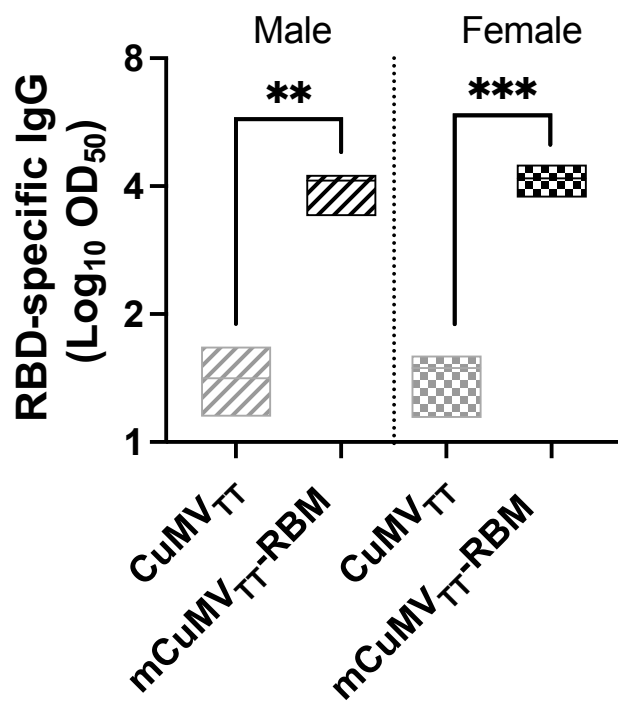

Supplement: ALL-9999-0-s004.pdf [file ALL-9999-0-s004.pdf]
